# Supplementary material
Source: PubMed Central journal article supplement (PMC8757569)
Supplement: NEJMc2119270_appendix.pdf [file NEJMc2119270_appendix.pdf]

## Supplementary Appendix

Supplement to: Collie S, Champion J, Moultrie H, et al. Effectiveness of BNT162b2 vaccine against omicron variant in South Africa. *N Engl J Med*. DOI: 10.1056/NEJMc2119270

This appendix has been provided by the authors to give readers additional information about the work.

## Supplement

### Table of Contents:

1. **Methods: page 2-3**
2. **References: page 4**
3. **Supplementary Figure 1 Genomic sequences by variant type in South Africa by calendar date (Source: Network for Genomic Surveillance in South Africa): page 5**
4. **Supplementary figure 2: Genomic sequences by variant type by province in South Africa by calendar date (Source: Network for Genomic Surveillance in South Africa): page 6**
5. **Supplementary figure 3: Frequency distribution (%) of breakthrough infections (BTIs) for Pfizer fully vaccinated Discovery clients vs. percentage frequency distribution of COVID19 admissions for Pfizer fully vaccinated Discovery clients between 1 September 2021-and 31 October 2021 by age band: page 7**
6. **Supplementary figure 4: Frequency distribution (%) of breakthrough infections (BTIs) for Pfizer fully vaccinated Discovery clients vs percentage frequency distribution of COVID19 admissions for Pfizer fully vaccinated Discovery clients between 1 November 2021-and 7 December 2021 (proxy Omicron period) by age band: page 8**
7. **Supplementary figure 5: Distribution by ward setting for BTI COVID19 admissions for fully Pfizer vaccinated Discovery clients: page 9**
8. **Supplementary table 1: Total COVID-19 tests in study period: page 10**
9. **Supplementary table 2: Cumulative distribution of time to admission since PCR collection date September-October 2021: page 11**
10. **Supplementary table 3: Distribution by data by confounders used in analysis: page 12- 13**
11. **Supplementary table 4: Sensitivity Analysis: page 14**
12. **Supplementary table 5: Discovery Health Population: positive and negative controls: page 15**
13. **Supplementary Table 6: List of comorbidities (presented in alphabetical order) has been adapted from the Prescribed Minimum Benefits Chronic Disease List (CDL) and the Centers for Disease Control and Prevention (CDC) list of conditions associated with increased risk of severe COVID-19: page 16-17**

## 1. Methods

We applied a test-negative design to estimate vaccine effectiveness, across two distinct time periods: 15 November – 7 December 2021 in South Africa, which we dubbed a proxy for Omicron variant dominance, against VE estimates between 1 September-30 October 2021 for fully vaccinated members, when the Delta variant was dominant.

### Data

#### Statistical analysis

The data were adjusted for the following confounders: age (18-29, then 10-year age bands and then age 80+), sex, number of documented CDC risk factors (0,1,2,3+), surveillance week, period of prior documented infection (D614G:2020/03/01-2020/10/31, Beta:2020/11/01-2021/05/16, and Delta: 2021/05/17-2021/10/31), and geographic region (province) [Supplementary table 3].

Vaccine effectiveness estimates were obtained from the following formula: 1- odds of COVID19 admission amongst the vaccinated population, where the odds ratio was calculated using logistic regression, adjusting for confounders. COVID19 admission was a dependent variable, while vaccination status was included as an independent variable. Vaccination coefficient estimates were exponentiated from the logistic regression model to obtain the adjusted odds ratio using the following calculation:

$$\text{Adjusted odds ratio} = e^{\beta}$$

where  $\beta$  denotes the beta coefficient estimate of vaccination status from the logistic regression model

95% confidence intervals (CIs) of the adjusted odds ratio were derived from the associated standard error estimates from the logistic regression for vaccination status using the following formula:

$$95\%CI (\text{Lower}, \text{Upper}): (e^{\beta-1.96 \times \sigma_x}, e^{\beta+1.96 \times \sigma_x})$$

where  $\sigma_x$  = the standard error of the vaccination status estimate from the logistic regression model

Test negative case control studies have been deemed powerful to assess vaccinations for a range of diseases [2]. The design specifies cases as individuals who tested positive with COVID19 and controls with a negative test. The design of the study looks to overcome and control for healthcare seeking behavior through selection of individuals who have both tested. The core assumption of the test negative design is predicated on the assumption that the intervention (vaccine) has no effect on other diseases with similar symptoms. We tested this assumption by assessing the distribution of vaccination status amongst our test negative controls with the distribution of vaccination status from the full underlying population [3] (Supplementary table 5). Another key assumption is that positive results emanate from highly specific testing. Positive tests were obtained from COVID19 PCR test results, which are highly specific. Furthermore, the design is predicated that test results are assessed on a symptomatic population, to avoid bias arising due to a different testing propensity amongst those vaccinated and controls. COVID19 PCR tests are funded from medical scheme benefits on referral from a clinician, and hence test results are most likely to be available for a symptomatic population. Furthermore, testing for travel purposes, is not funded from medical scheme benefits.

Vaccination status was analyzed in the following categories (not vaccinated; 0-3, 4-6, 7-9, 10-13, 14-20, 21-27, 28 days onwards since dose one vaccination; 0-6, 7-13, and 14+ since dose two vaccination for BNT162b2 recipients and other vaccine recipients. Vaccine recipients were classified as other based on a match with the national Electronic Vaccination Data System as at 25 August 2021. We were unable to ascertain vaccine type nor an update from the Department of Health of clients vaccinated in the public sector since.

Therefore, VE estimates provided should be viewed as conservative as unvaccinated controls may inadvertently include vaccinated individuals. Given, the 42 Pfizer dose schedule, and the number of Discovery clients accessing vaccination in public sector sites prior to 25 August 2021, we estimate no more than 10% misclassification error of unvaccinated controls.

Data exclusions rules applied were consistent with those published by Bernal and colleagues<sup>1</sup>:

- Negative tests with 21 days of a positive test
- Negative tests within 7 days of another negative test result
- Positive and negative results within 6 weeks of a previous positive test result
- No more than 3 test results per patient were included in the study. Patients with more than three test results, contributed a random selection of three test results

Furthermore, indeterminate test results, test results for individuals younger than age 18, or test results for individuals with more than two vaccine doses were excluded. During the analysis period, booster doses were not available to the South African public.

Three sensitivity analysis were performed to confirm veracity of VE estimates in the proxy Omicron period:

- First, RT-PCR tests with S-Gene Target Failure were used to detect omicron infections;
- Secondly only COVID19 PCR results within the Gauteng province were analyzed, given the geographical concentration of the Omicron variant over the study period;
- Third, limiting PCR test results limited to the admitted population (e.g. respiratory medical admissions), the latter a proxy for identifying tests amongst a symptomatic population

Each of the mean estimates, including their associated standard errors from each sensitivity analysis, were compared to the mean estimate from the Proxy Omicron period, accounting for its standard error, using the two sample t-test and a p-value<0.05 to reject the null hypothesis, where the null hypothesis

is:  $H_0: u_{omicron} = u_{sensitivity}$

Calculations were performed using R version 4.1.1

## 2. References

1. Lopez Bernal J, Andrews N, Gower C, et al. Effectiveness of the Pfizer-BioNTech and Oxford-AstraZeneca vaccines on covid-19 related symptoms, hospital admissions, and mortality in older adults in England: test negative case-control study; *BMJ* 2021;373:n1088
2. Chua H, Feng S, Lewnard JA, et al. The Use of Test-negative Controls to Monitor Vaccine Effectiveness: A Systematic Review of Methodology. *Epidemiology*. 2020;31(1):43-64. doi:10.1097/EDE.0000000000001116
3. World Health Organization. Design of vaccine efficacy trials to be used during public health emergencies—points of considerations and key principles. 2020. [https://www.who.int/docs/default-source/blue-print/working-group-for-vaccine-evaluation-\(4th-consultation\)/ap1-guidelines-online-consultation.pdf](https://www.who.int/docs/default-source/blue-print/working-group-for-vaccine-evaluation-(4th-consultation)/ap1-guidelines-online-consultation.pdf)

**Supplementary figure 1: Genomic sequences by variant type in South Africa by calendar date (Source: Network for Genomic Surveillance in South Africa)**

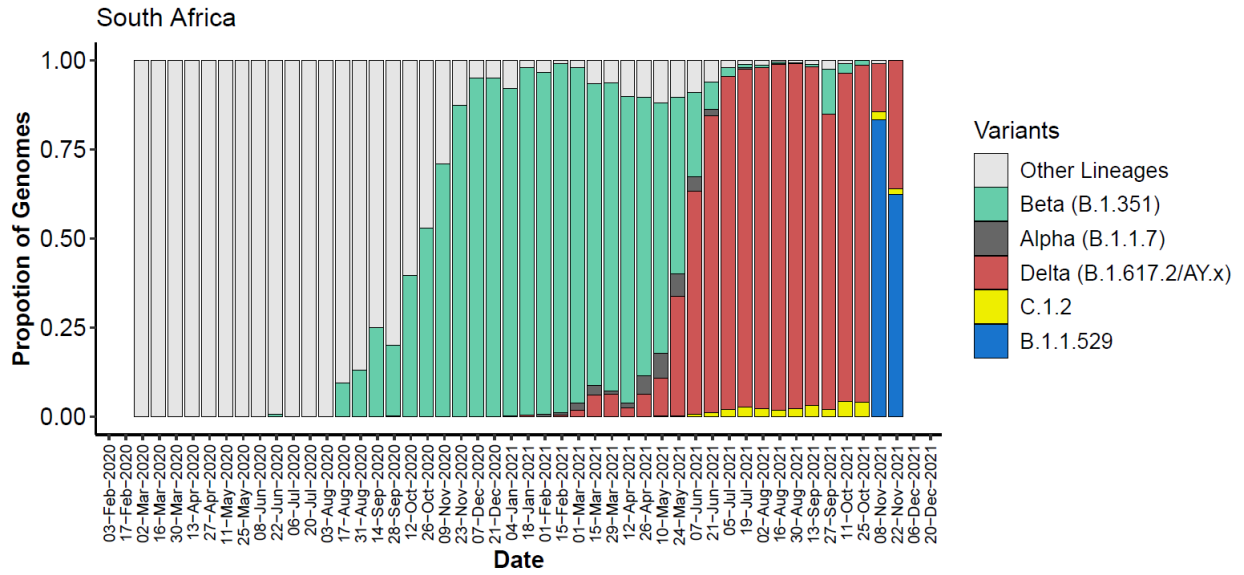

**Supplementary figure 2: Genomic sequences by variant type by province in South Africa by calendar date (Source: Network for Genomic Surveillance in South Africa)**

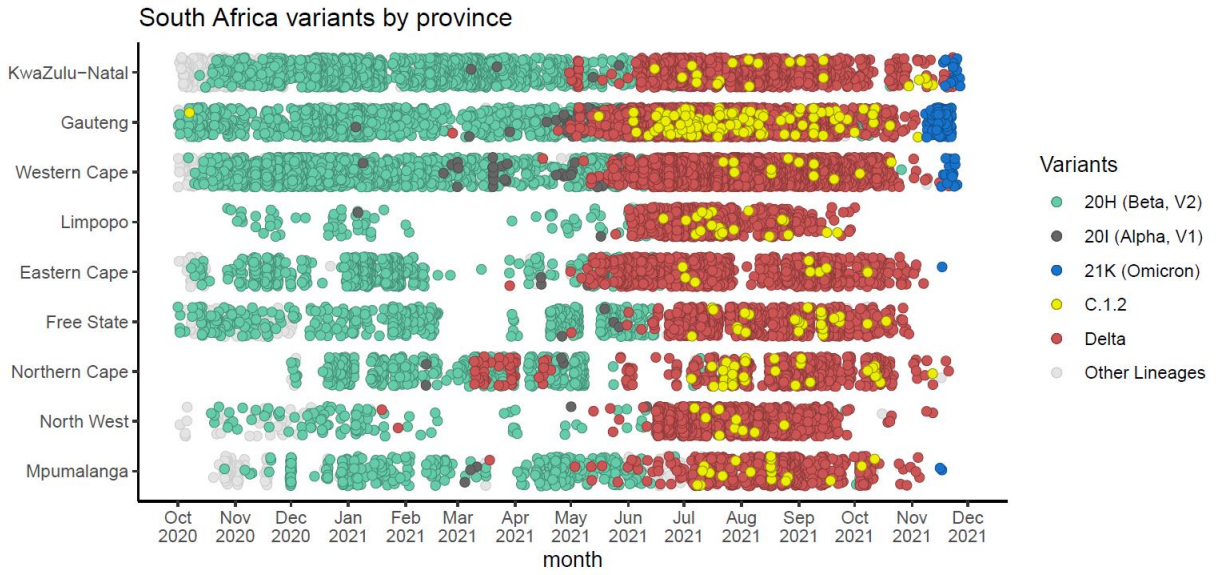

**Supplementary figure 3: Frequency distribution (%) of breakthrough infections (BTIs) for Pfizer fully vaccinated Discovery clients vs. percentage frequency distribution of COVID19 admissions for Pfizer fully vaccinated Discovery clients between 1 September 2021-and 31 October 2021 by age band.**

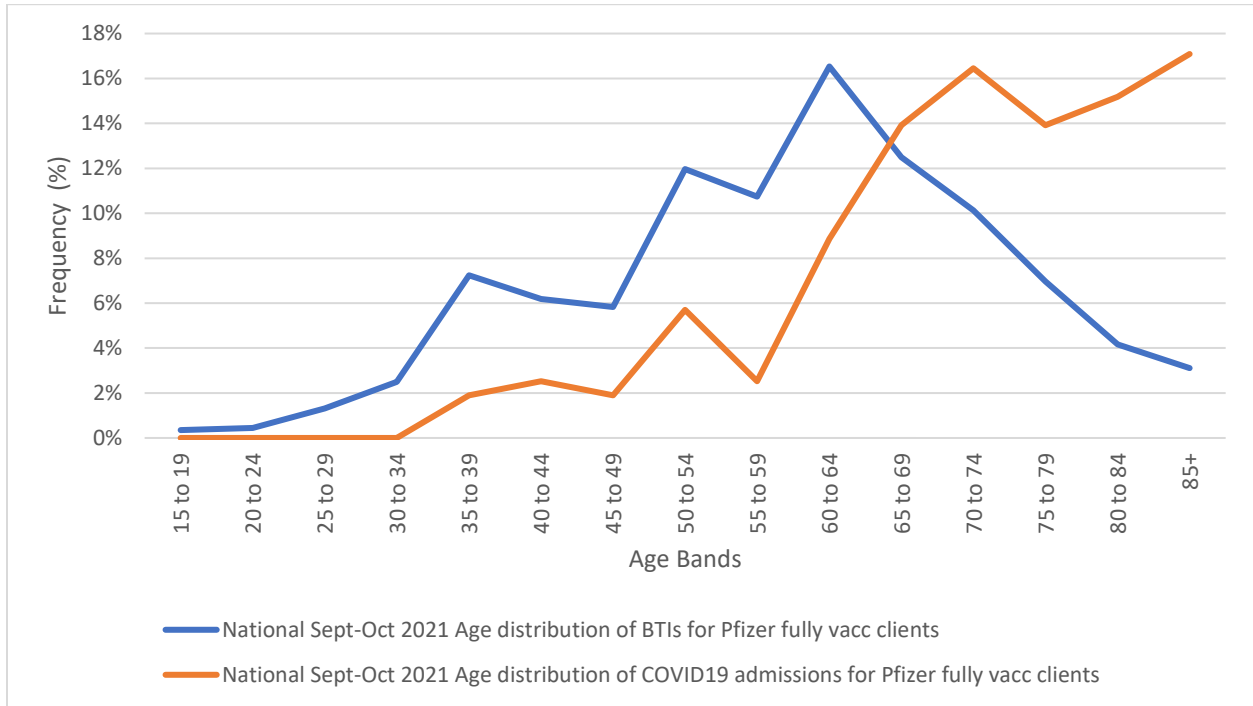



**Supplementary figure 4: Frequency distribution (%) of breakthrough infections (BTIs) for Pfizer fully vaccinated Discovery clients vs percentage frequency distribution of COVID19 admissions for Pfizer fully vaccinated Discovery clients between 1 November 2021-and 7 December 2021 (proxy Omicron period) by age band.**

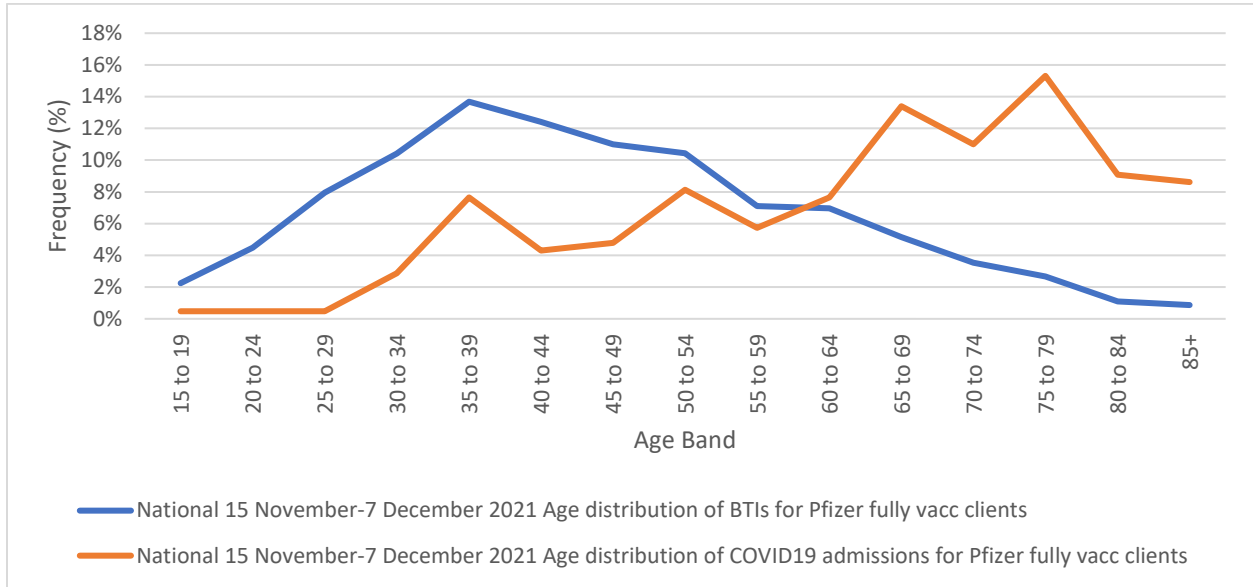

**Supplementary figure 5: Distribution by ward setting for BTI COVID19 admissions for fully Pfizer vaccinated Discovery clients**

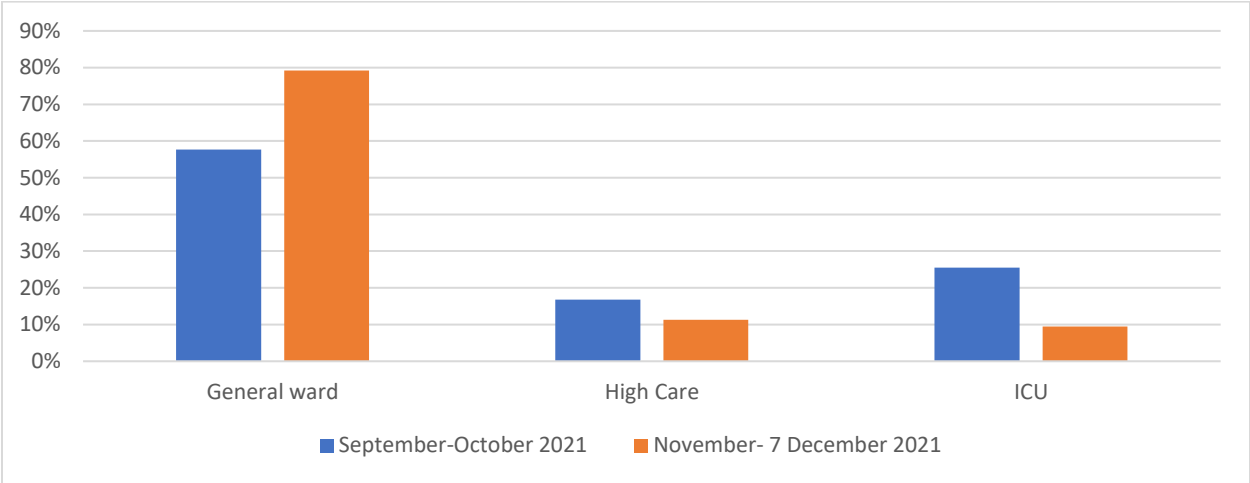

**Supplementary table 1: Total COVID-19 tests in study period**

|                                                            | Number of test (%)     |
|------------------------------------------------------------|------------------------|
| <b>Total Tests from 1 September – 7 December 2021</b>      | <b>259,193 (100.0)</b> |
| Negative test within 21 days of positive                   | 1,594 (0.6)            |
| Negative test in the prior 7 days of another negative test | 7,352 (2.8)            |
| Prior positive test within 6 weeks                         | 1,258 (0.5)            |
| Greater than 2 vaccine doses received                      | 266 (0.1)              |
| Result missing                                             | 299 (0.1)              |
| Age less than 18                                           | 35,906 (13.9)          |
| Not chosen as 3 random tests                               | 908 (0.4)              |
| <b>Included in study</b>                                   | <b>211,610 (81.6)</b>  |
|                                                            |                        |
| 01 September - 31 October 2021                             | 133,437 (51.5)         |
| 15 November - 7 December 2021 – omicron proxy period       | 78,173 (30.2)          |
| Sensitivity one: SGTF positive- Lancet Laboratories        | 34,923 (13.5)          |
| Sensitivity two: Gauteng                                   | 42,655 (16.5)          |
| Sensitivity three: Symptomatic admitted population         | 6,243 (2.4)            |

**Supplementary table 2: Cumulative distribution of time to admission since PCR collection date September-October 2021**

| Time to admission since PCR collection date Oct/Nov (days) | Not vaccinated cumulative distribution | Vaccinated Cumulative Distribution |
|------------------------------------------------------------|----------------------------------------|------------------------------------|
| 0                                                          | 65.9%                                  | 57.9%                              |
| 1                                                          | 72.6%                                  | 70.7%                              |
| 2                                                          | 78.4%                                  | 82.6%                              |
| 3                                                          | 81.2%                                  | 84.7%                              |
| 4                                                          | 84.4%                                  | 86.8%                              |
| 5                                                          | 87.3%                                  | 89.1%                              |
| 6                                                          | 89.9%                                  | 91.2%                              |
| 7                                                          | 92.3%                                  | 92.5%                              |
| 8                                                          | 93.8%                                  | 93.9%                              |
| 9                                                          | 96.9%                                  | 95.3%                              |
| 10+                                                        | 100.00%                                | 100.00%                            |

Data was extracted from Discovery data systems on 9 December 2021. This implies that 80% of COVID19 related admissions for cases registered on 7 December 2021 have been included amongst both the vaccinated and unvaccinated population.

**Supplementary table 3: Distribution by data by confounders used in analysis**

| (n,%)                                     | 01 October-September 2021 |                                  |                              | 15 November-7 December 2021 |                                  |                              |
|-------------------------------------------|---------------------------|----------------------------------|------------------------------|-----------------------------|----------------------------------|------------------------------|
| 0                                         | Number of tests           | Number of positive COVID19 tests | Number of COVID19 admissions | Number of tests             | Number of positive COVID19 tests | Number of COVID19 admissions |
| Age (in years)                            |                           |                                  |                              |                             |                                  |                              |
| 18-29                                     | 20,171 (15.1)             | 1,706 (19.9)                     | 54 (5.8)                     | 13,340 (17.1)               | 4,407 (23.1)                     | 62 (14.5)                    |
| 30-39                                     | 35,769 (26.8)             | 2,428 (28.3)                     | 146 (15.8)                   | 21,735 (27.8)               | 6,341 (33.3)                     | 104 (24.2)                   |
| 40-49                                     | 24,615 (18.4)             | 1,947 (22.7)                     | 189 (20.4)                   | 15,755 (20.2)               | 4,293 (22.5)                     | 66 (15.4)                    |
| 50-59                                     | 18,712 (14.0)             | 1,192 (13.9)                     | 171 (18.5)                   | 10,923 (14.0)               | 2,231 (11.7)                     | 60 (14.0)                    |
| 60-69                                     | 16,300 (12.2)             | 659 (7.7)                        | 152 (16.4)                   | 8,279 (10.6)                | 1,114 (5.8)                      | 50 (11.7)                    |
| 70-79                                     | 12,553 (9.4)              | 424 (4.9)                        | 125 (13.5)                   | 5,731 (7.3)                 | 507 (2.7)                        | 53 (12.4)                    |
| 80+                                       | 5,317 (4.0)               | 213 (2.5)                        | 88 (9.5)                     | 2,410 (3.1)                 | 177 (0.9)                        | 34 (7.9)                     |
| Sex                                       |                           |                                  |                              |                             |                                  |                              |
| Male                                      | 54,255 (40.7)             | 3,744 (43.7)                     | 461 (49.8)                   | 32,031 (41.0)               | 8,166 (42.8)                     | 174 (40.6)                   |
| Female                                    | 79,182 (59.3)             | 4,825 (56.3)                     | 464 (50.2)                   | 46,142 (59.0)               | 10,904 (57.2)                    | 255 (59.4)                   |
| Number of CDC risk factors**              |                           |                                  |                              |                             |                                  |                              |
| 0                                         | 71,344 (53.5)             | 5,265 (61.4)                     | 318 (34.4)                   | 45,955 (58.8)               | 12,910 (67.7)                    | 194 (45.2)                   |
| 1                                         | 36,853 (27.6)             | 2,131 (24.9)                     | 291 (31.5)                   | 20,966 (26.8)               | 4,607 (24.2)                     | 125 (29.1)                   |
| 2                                         | 16,987 (12.7)             | 828 (9.7)                        | 195 (21.1)                   | 8,098 (10.4)                | 1,229 (6.4)                      | 70 (16.3)                    |
| 3+                                        | 8,253 (6.2)               | 345 (4.0)                        | 121 (13.1)                   | 3,154 (4.0)                 | 324 (1.7)                        | 40 (9.3)                     |
| Calendar week                             |                           |                                  |                              |                             |                                  |                              |
| 35                                        | 13,349 (10.0)             | 2,039 (23.8)                     | 199 (21.5)                   | 0 (0.0)                     | 0 (0.0)                          | 0 (0.0)                      |
| 36                                        | 20,010 (15.0)             | 2,517 (29.4)                     | 264 (28.5)                   | 0 (0.0)                     | 0 (0.0)                          | 0 (0.0)                      |
| 37                                        | 18,102 (13.6)             | 1,600 (18.7)                     | 156 (16.9)                   | 0 (0.0)                     | 0 (0.0)                          | 0 (0.0)                      |
| 38                                        | 12,942 (9.7)              | 741 (8.6)                        | 81 (8.8)                     | 0 (0.0)                     | 0 (0.0)                          | 0 (0.0)                      |
| 39                                        | 15,164 (11.4)             | 646 (7.5)                        | 75 (8.1)                     | 0 (0.0)                     | 0 (0.0)                          | 0 (0.0)                      |
| 40                                        | 14,177 (10.6)             | 395 (4.6)                        | 56 (6.1)                     | 0 (0.0)                     | 0 (0.0)                          | 0 (0.0)                      |
| 41                                        | 14,711 (11.0)             | 329 (3.8)                        | 43 (4.6)                     | 0 (0.0)                     | 0 (0.0)                          | 0 (0.0)                      |
| 42                                        | 12,795 (9.6)              | 166 (1.9)                        | 28 (3.0)                     | 0 (0.0)                     | 0 (0.0)                          | 0 (0.0)                      |
| 43                                        | 12,187 (9.1)              | 136 (1.6)                        | 23 (2.5)                     | 0 (0.0)                     | 0 (0.0)                          | 0 (0.0)                      |
| 46                                        | 0 (0.0)                   | 0 (0.0)                          | 0 (0.0)                      | 13,314 (17.0)               | 351 (1.8)                        | 25 (5.8)                     |
| 47                                        | 0 (0.0)                   | 0 (0.0)                          | 0 (0.0)                      | 15,982 (20.4)               | 1,842 (9.7)                      | 65 (15.2)                    |
| 48                                        | 0 (0.0)                   | 0 (0.0)                          | 0 (0.0)                      | 32,436 (41.5)               | 10,520 (55.2)                    | 231 (53.8)                   |
| Period of last documented prior infection |                           |                                  |                              |                             |                                  |                              |
| None                                      | 117,510 (88.1)            | 8,238 (96.1)                     | 890 (96.2)                   | 65,292 (83.5)               | 16,846 (88.3)                    | 390 (90.9)                   |

|                               |               |              |            |               |               |            |
|-------------------------------|---------------|--------------|------------|---------------|---------------|------------|
| D614G (2020/03/01-2020/10/31) | 4,741 (3.6)   | 103 (1.2)    | 17 (1.8)   | 2,688 (3.4)   | 613 (3.2)     | 11 (2.6)   |
| Beta (2020/11/01-2021/05/16)  | 6,650 (5.0)   | 142 (1.7)    | 11 (1.2)   | 3,787 (4.8)   | 658 (3.5)     | 11 (2.6)   |
| Delta (2021/05/17-2021/10/31) | 4,536 (3.4)   | 86 (1.0)     | 7 (0.8)    | 6,406 (8.2)   | 953 (5.0)     | 17 (4.0)   |
| Province                      |               |              |            |               |               |            |
| Eastern Cape                  | 7,251 (5.4)   | 908 (10.6)   | 72 (7.8)   | 2,295 (2.9)   | 325 (1.7)     | 8 (1.9)    |
| Free State                    | 5,712 (4.3)   | 600 (7.0)    | 95 (10.3)  | 2,359 (3.0)   | 356 (1.9)     | 15 (3.5)   |
| Gauteng                       | 55,397 (41.5) | 1,795 (20.9) | 170 (18.4) | 42,655 (54.6) | 13,348 (70.0) | 246 (57.3) |
| Kwazulu Natal                 | 22,653 (17.0) | 1,673 (19.5) | 255 (27.6) | 10,203 (13.1) | 1,498 (7.9)   | 75 (17.5)  |
| Limpopo                       | 2,126 (1.6)   | 101 (1.2)    | 16 (1.7)   | 1,415 (1.8)   | 493 (2.6)     | 11 (2.6)   |
| Mpumalanga                    | 4,837 (3.6)   | 314 (3.7)    | 40 (4.3)   | 2,531 (3.2)   | 668 (3.5)     | 19 (4.4)   |
| North West                    | 4,515 (3.4)   | 248 (2.9)    | 37 (4.0)   | 2,338 (3.0)   | 544 (2.9)     | 14 (3.3)   |
| Northern Cape                 | 2,295 (1.7)   | 282 (3.3)    | 29 (3.1)   | 904 (1.2)     | 81 (0.4)      | 3 (0.7)    |
| Western Cape                  | 28,020 (21.0) | 2,607 (30.4) | 211 (22.8) | 13,000 (16.6) | 1,588 (8.3)   | 36 (8.4)   |
| Not allocated                 | 631 (0.5)     | 41 (0.5)     | 0 (0.0)    | 473 (0.6)     | 169 (0.9)     | 2 (0.5)    |

**Supplementary table 4: Sensitivity Analysis**

| (n,%)                          | Sensitivity one: SGTF positive-Lancet Laboratories |                                  |                              | Sensitivity two: Gauteng |                                  |                              | Sensitivity three: Symptomatic admitted population |                                  |                              |
|--------------------------------|----------------------------------------------------|----------------------------------|------------------------------|--------------------------|----------------------------------|------------------------------|----------------------------------------------------|----------------------------------|------------------------------|
|                                | Number of tests                                    | Number of positive COVID19 tests | Number of COVID19 admissions | Number of tests          | Number of positive COVID19 tests | Number of COVID19 admissions | Number of tests                                    | Number of positive COVID19 tests | Number of COVID19 admissions |
| Not Vaccinated                 | 12,548 (35.9)                                      | 3,345 (44.6)                     | 50 (53.2)                    | 14,220 (33.3)            | 5,478 (41.0)                     | 117 (47.6)                   | 2,034 (32.6)                                       | 252 (52.2)                       | 220 (51.8)                   |
| Pfizer dose one                | 2,887 (8.3)                                        | 572 (7.6)                        | 9 (9.6)                      | 3,637 (8.5)              | 1,087 (8.1)                      | 27 (11.0)                    | 421 (6.7)                                          | 35 (7.2)                         | 33 (7.8)                     |
| Pfizer <14 days post dose two  | 291 (0.8)                                          | 31 (0.4)                         | 0 (0.0)                      | 382 (0.9)                | 79 (0.6)                         | 0 (0.0)                      | 33 (0.5)                                           | 0 (0.0)                          | 0 (0.0)                      |
| Pfizer >=14 days post dose two | 13,682 (39.2)                                      | 2,337 (31.2)                     | 27 (28.7)                    | 17,789 (41.7)            | 4,478 (33.5)                     | 72 (29.3)                    | 2,935 (47.0)                                       | 132 (27.3)                       | 120 (28.2)                   |
| Other vaccine* type            | 5,515 (15.8)                                       | 1,214 (16.2)                     | 8 (8.5)                      | 6,627 (15.5)             | 2,226 (16.7)                     | 30 (12.2)                    | 820 (13.1)                                         | 64 (13.3)                        | 52 (12.2)                    |
| Total                          | 34,923 (100.0)                                     | 7,499 (100.0)                    | 94 (100.0)                   | 42,655 (100.0)           | 13,348 (100.0)                   | 246 (100.0)                  | 6,243 (100.0)                                      | 483 (100.0)                      | 425 (100.0)                  |

*\*Based on a match with the national Electronic Vaccination Data System as at 25 August 2021. We were unable to ascertain vaccine type nor an update from the Department of Health of clients vaccinated in the public sector since. Therefore, VE estimates provided should be viewed as conservative as unvaccinated controls may inadvertently include vaccinated individuals. Given, the 42 Pfizer dose schedule, and the number of Discovery clients accessing vaccination in public sector sites prior to 25 August 2021, we estimate no more than 10% misclassification error of unvaccinated controls.*

**Supplementary table 5: Discovery Health Population: positive and negative controls**

|                                                        | Negative control distribution 01 September - 31 October 2021 | Positive and Negative distribution 01 September - 31 October 2021 | Negative control distribution 15 November - 7 December 2021 | Positive and Negative distribution -15 November- 7 December 2021 | All Discovery Health administered scheme adult population – 01 September 2021 | All Discovery Health administered scheme adult population -7 December 2021 |
|--------------------------------------------------------|--------------------------------------------------------------|-------------------------------------------------------------------|-------------------------------------------------------------|------------------------------------------------------------------|-------------------------------------------------------------------------------|----------------------------------------------------------------------------|
| Not vaccinated                                         | 38.6%                                                        | 40.0%                                                             | 31.2%                                                       | 33.7%                                                            | 43.3%                                                                         | 38.9%                                                                      |
| Pfizer dose one                                        | 12.5%                                                        | 12.7%                                                             | 8.0%                                                        | 7.9%                                                             | 13.5%                                                                         | 7.5%                                                                       |
| Pfizer less than 4 days post dose two                  | 4.0%                                                         | 3.9%                                                              | 0.9%                                                        | 0.8%                                                             | 2.6%                                                                          | 1.4%                                                                       |
| Pfizer greater than and equal to 14 days post dose two | 30.0%                                                        | 28.6%                                                             | 44.1%                                                       | 41.4%                                                            | 25.6%                                                                         | 36.8%                                                                      |
| Other vaccine type                                     | 14.9%                                                        | 14.8%                                                             | 15.9%                                                       | 16.2%                                                            | 15.0%                                                                         | 15.4%                                                                      |



**Supplementary Table 6: List of comorbidities (presented in alphabetical order) has been adapted from the Prescribed Minimum Benefits Chronic Disease List (CDL) and the Centers for Disease Control and Prevention (CDC) list of conditions associated with increased risk of severe COVID-19 (<https://www.cdc.gov/coronavirus/2019-ncov/need-extra-precautions/people-with-medical-conditions.html>).**

| Number | Category                    | Conditions                                                                                                                                                                                                                                            |
|--------|-----------------------------|-------------------------------------------------------------------------------------------------------------------------------------------------------------------------------------------------------------------------------------------------------|
| 1      | Cancer                      | <ul style="list-style-type: none"> <li>• Cancer</li> </ul>                                                                                                                                                                                            |
| 2      | Cardiovascular disease      | <ul style="list-style-type: none"> <li>• Cardiac failure</li> <li>• Cardiomyopathy</li> <li>• Coronary artery disease</li> <li>• Dysrhythmias</li> <li>• Peripheral arterial disease</li> <li>• Cerebrovascular disease (including stroke)</li> </ul> |
| 3      | Chronic renal disease       | <ul style="list-style-type: none"> <li>• Chronic renal disease</li> </ul>                                                                                                                                                                             |
| 4      | Chronic respiratory disease | <ul style="list-style-type: none"> <li>• Asthma</li> <li>• COPD</li> <li>• Bronchiectasis</li> </ul>                                                                                                                                                  |
| 5      | Diabetes mellitus           | <ul style="list-style-type: none"> <li>• Diabetes Mellitus 1</li> <li>• Diabetes Mellitus 2</li> </ul>                                                                                                                                                |
| 6      | HIV                         | <ul style="list-style-type: none"> <li>• HIV</li> </ul>                                                                                                                                                                                               |
| 7      | Hypertension                | <ul style="list-style-type: none"> <li>• Hypertension</li> </ul>                                                                                                                                                                                      |
| 8      | Liver disease               | <ul style="list-style-type: none"> <li>• Alcoholic liver disease</li> <li>• Fatty liver disease</li> <li>• Cirrhosis</li> </ul>                                                                                                                       |
| 9      | Neurological disorders      | <ul style="list-style-type: none"> <li>• Epilepsy</li> <li>• Parkinson's disease</li> <li>• Dementia (any cause, including Alzheimer's disease)</li> </ul>                                                                                            |
| 10     | Overweight / obesity        | <ul style="list-style-type: none"> <li>• BMI &gt;25</li> </ul>                                                                                                                                                                                        |
| 11     | Severe mental disorders     | <ul style="list-style-type: none"> <li>• Bipolar mood disorder</li> <li>• Schizophrenia</li> </ul>                                                                                                                                                    |

| Number | Category               | Conditions                                                                                                                         |
|--------|------------------------|------------------------------------------------------------------------------------------------------------------------------------|
| 12     | Solid organ transplant | <ul style="list-style-type: none"><li data-bbox="947 237 1570 261">• History of Kidney, liver, heart, or lung transplant</li></ul> |
